# Supplementary material
Source: Springer Nature journal article supplement (https://www.springermedizin.de/resource/supplementary/12943_2013_1286_MOESM3_ESM.pdf/9553148)
Supplement: MOESM3 [file 9553148]

**Figure S3**

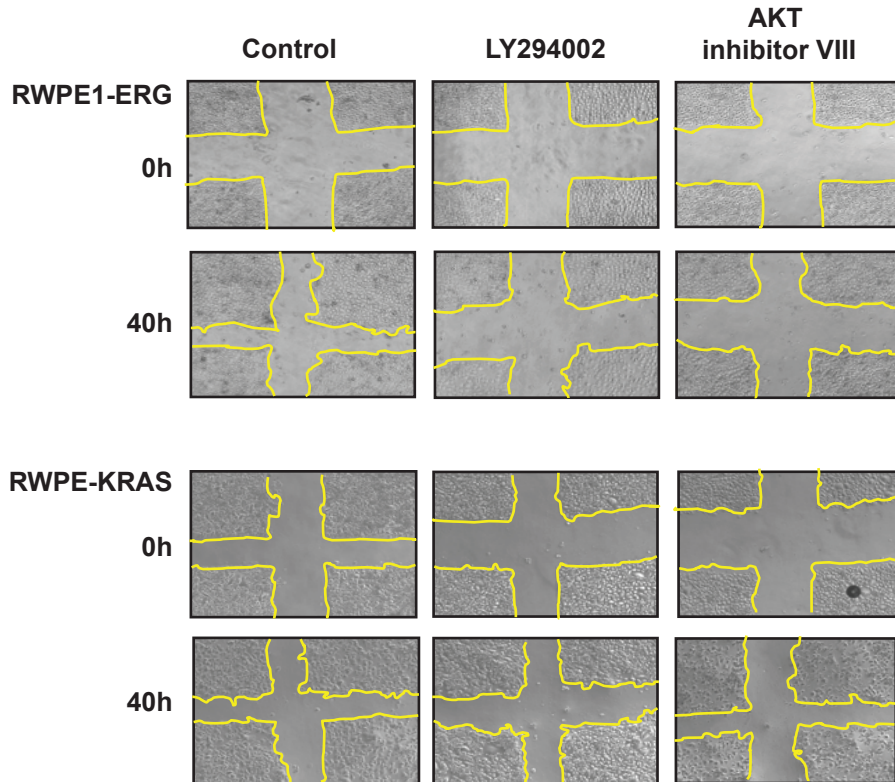

**Figure S3.** Representative images of a scratch assay performed in RWPE-ERG and RWPE-KRAS cell lines. The cell lines were treated with or without LY294002 (20  $\mu$ M) or AKT inhibitor VIII (10  $\mu$ M) and images were taken 0 and 40h post scratching.
